# Supplementary material for: Equilibrium and kinetic data for the interaction of diaqua-(S-methyl-l-cysteine)palladium(ii) with biologically relevant ligands
Source: Royal Society of Chemistry journal article supplement (doi:10.1039/b206068j), 2002-01-01
Supplement: b206068j.doc [file b206068j.doc]

**Supplementary Material**

**Equilibrium and kinetic data for the interaction of diaqua-(S-methyl-L-cysteine)palladium(II) with biologically relevant ligands**

Živadin D. Bugarčić,a,b Mohamed M. Shoukryb,c and Rudi van Eldikb,*

aDepartment of Chemistry, University of Kragujevac, 34000 Kragujevac, Yugoslavia

bInstitute for Inorganic Chemistry, University of Erlangen-Nürnberg, Egerlandstrasse 1, 91058 Erlangen, Germany

cDepartment of Chemistry, Faculty of Science, University of Cairo, Cairo, Egypt

Table SI. Observed pseudo-first-order rate constants as a function of excess of

ligand for the first reaction between [Pd(SCM)(H2O)2]+ and inosine.

______________________________________________

T / oC 103[inosine]/ M kobsd / s-1

______________________________________________

5.0 1.25 44  2(6)a

5.0 2.5 66  3(4)

5.0 3.8 88  4(5)

5.0 5.5 116  6(4)

1. 7.1 140  6(5)

5.0 9.4 178  9(5)

5.0 12.5 231  10(4)

15.0 1.25 60  3(6)

15.0 2.5 89  4(5)

15.0 3.8 116  8(5)

15.0 5.5 157  7(4)

1. 7.1 188  8(5)

15.0 9.4 242  9(5)

15.0 12.5 312  11(5)

25.0 1.25 82  4(6)

25.0 2.5 124  6(6)

25.0 3.8 172  8(5)

25.0 5.5 218  10(4)

25.0 7.1 278  11(4)

1. 9.4 355  12(4)

25.0 12.5 456  14(5)

______________________________________________

aNumber of runs in parentheses.

Table SII. Observed pseudo-first-order rate constants as a function of excess of

ligand for the first reaction between [Pd(SCM)(H2O)2]+ and 5’-IMP.

______________________________________________

T / oC 103[5’-IMP]/ M kobsd / s-1

______________________________________________

5.0 1.52 48  3(6)a

5.0 3.1 60  4(5)

5.0 5.2 77  4(4)

5.0 7.2 91  5(4)

1. 10.1 112  6(4)

5.0 13.5 138  9(5)

15.0 1.52 58  3(6)

15.0 3.1 77  4(5)

15.0 5.2 104  9(5)

15.0 7.2 125  8(5)

1. 10.1 160  12(5)

15.0 13.5 204  13(6)

25.0 1.52 72  3(6)

25.0 3.1 98  5(4)

25.0 5.2 138  8(4)

25.0 7.5 180  10(5)

25.0 10.1 227  12(6)

1. 13.5 278  15(4)

_____________________________________________________

aNumber of runs in parentheses.

Table SIII. Observed pseudo-first-order rate constants as a function of excess of

ligand for the first reaction between [Pd(SCM)(H2O)2]+ and 5’-GMP.

______________________________________________

T / oC 103[5’-GMP]/ M kobsd / s-1

______________________________________________

5.0 1.48 58  3(4)a

5.0 2.4 68  5(5)

5.0 3.5 80  6(5)

5.0 5.1 98  6(4)

1. 7.0 118  8(6)

5.0 9.4 148  11(6)

5.0 12.2 180  10(6)

15.0 1.48 68  4(5)

15.0 2.4 84  5(5)

15.0 3.5 104  7(4)

15.0 5.1 127  8(4)

1. 7.0 159  8(4)

15.0 9.4 198  10(5)

15.0 12.2 244 12(6)

25.0 1.48 90  4(4)

25.0 2.4 108  6(5)

25.0 3.5 136  7(5)

25.0 5.1 178  8(5)

25.0 7.0 221  12(5)

1. 9.4 278  11(6)

25.0 12.2 344  14(5)

____________________________________________________

aNumber of runs in parentheses.

Table SIV. Observed pseudo-first-order rate constants as a function of excess of

ligand for the second reaction between [Pd(SCM)(H2O)2]+ and inosine.

______________________________________________

T / oC 103[inosine]/ M kobsd / s-1

______________________________________________

5.0 2.5 3.01  0.23(4)a

5.0 3.8 3.03  0.07(5)

5.0 5.5 3.22  0.10(4)

1. 7.1 3.37  0.03(6)

5.0 9.4 3.34  0.17(4)

5.0 12.5 3.64  0.21(4)

15.0 2.5 3.67  0.11(5)

15.0 3.8 3.80  0.03(4)

15.0 5.5 4.04  0.07(5)

15.0 9.4 4.53  0.12(5)

15.0 12.5 4.80  0.22(6)

25.0 1.25 4.51  0.12(5)

25.0 2.5 4.72  0.08(5)

25.0 3.8 4.90  0.07(6)

25.0 5.5 5.07  0.17(4)

25.0 7.1 5.39  0.21(6)

1. 9.4 5.68  0.32(5)

25.0 12.5 6.24  0.28(4)

____________________________________________________

aNumber of runs in parentheses.

Table SV. Observed pseudo-first-order rate constants as a function of excess of

ligand for the second reaction between [Pd(SCM)(H2O)2]+ and 5’-IMP.

______________________________________________

T / oC 103[5’-IMP]/ M kobsd / s-1

______________________________________________

5.0 2.5 3.01  0.12(4)a

5.0 3.8 3.08  0.02(5)

5.0 5.5 3.18  0.22(5)

1. 7.1 3.28  0.12(5)

5.0 9.4 3.36  0.22(5)

5.0 12.5 3.48  0.18(5)

15.0 2.5 3.69  0.02(4)

15.0 3.8 3.84  0.08(4)

15.0 5.5 4.04  0.04(4)

15.0 7.1 4.16  0.11(6)

15.0 9.4 4.31  0.26(6)

15.0 12.5 4.64  0.18(5)

25.0 1.25 4.51  0.06(5)

25.0 2.5 4.72  0.19(6)

25.0 3.8 4.90  0.17(7)

25.0 5.5 5.07  0.08(8)

25.0 7.1 5.27  0.17(6)

1. 9.4 5.54  0.14(4)

25.0 12.5 5.96  0.22(5)

____________________________________________________

aNumber of runs in parentheses.

Table SVI. Observed pseudo-first-order rate constants as a function of excess of

ligand for the second reaction between [Pd(SCM)(H2O)2]+ and 5’-GMP.

______________________________________________

T / oC 103[5’-GMP]/ M kobsd / s-1

______________________________________________

5.0 2.5 3.01  0.01(4)a

5.0 3.8 3.08  0.12(5)

5.0 5.5 3.20  0.12(6)

1. 7.1 3.30  0.06(4)

5.0 9.4 3.34  0.07(5)

5.0 12.5 3.67  0.14(5)

15.0 2.5 3.59  0.02(4)

15.0 3.8 3.78  0.12(4)

15.0 5.5 3.98  0.14(6)

15.0 9.4 4.44  0.12(7)

15.0 12.5 4.62  0.08(4)

25.0 1.25 4.51  0.17(5)

25.0 2.5 4.70  0.16(4)

25.0 3.8 4.90  0.26(7)

25.0 5.5 5.03  0.24(5)

25.0 7.1 5.32  0.28(7)

1. 9.4 5.57  0.54(5)

25.0 12.5 6.10  0.86(5)

____________________________________________________

aNumber of runs in parentheses.

Table SVII. Pressure dependence of the second reaction between [Pt(SMC)(H2O)2]+ and inosine at 25.0 oC. [compl.] = 1 x 10-3 M, [INO] = 1.5 x 10-2 M

______________________________________________

P (MPa) kobsd (s-1)

______________________________________________

10 8.6  0.5(3)a

50 9.2  0.7(4)

90 10.4  0.8(4)

130 11.0  1.2(4)

______________________________________________

aNumber of runs in parentheses.

Table SVIII. Pressure dependence of the second reaction between [Pt(SMC)(H2O)2]+ and 5’-IMP at 25.0 oC. [compl.] = 1 x 10-3 M, [5’-IMP] = 1.4 x 10-2 M

______________________________________________

P (MPa) kobsd (s-1)

______________________________________________

10 7.5  0.4(4)a

50 8.5  0.5(4)

90 9.7  0.8(3)

130 10.5  1.1(5)

______________________________________________

aNumber of runs in parentheses.

Table SIX. Pressure dependence of the reaction between [Pt(SMC)(H2O)2]+ and

5’-GMP at 25.0 oC. [compl.] = 1 x 10-3 M, [5’-GMP] = 1.7 x 10-2 M

______________________________________________

P (MPa) kobsd (s-1)

______________________________________________

10 8.3  0.8(5)a

50 9.1  0.8 (3)

90 10.2  1.2(4)

130 11.8  1.7(4)

______________________________________________

aNumber of runs in parentheses.
